# Supplementary figures and images for: Synthesis of Benzothiophene-Fused Pyran Derivatives via Piperidine Promoted Domino Reaction
Source: Hindawi journal article supplement (doi:10.1155/2019/4361410), 2019-05-02

Support Information

Contents

1. Copies of 1H NMR and 13C NMR spectra of all new compound…………………S2


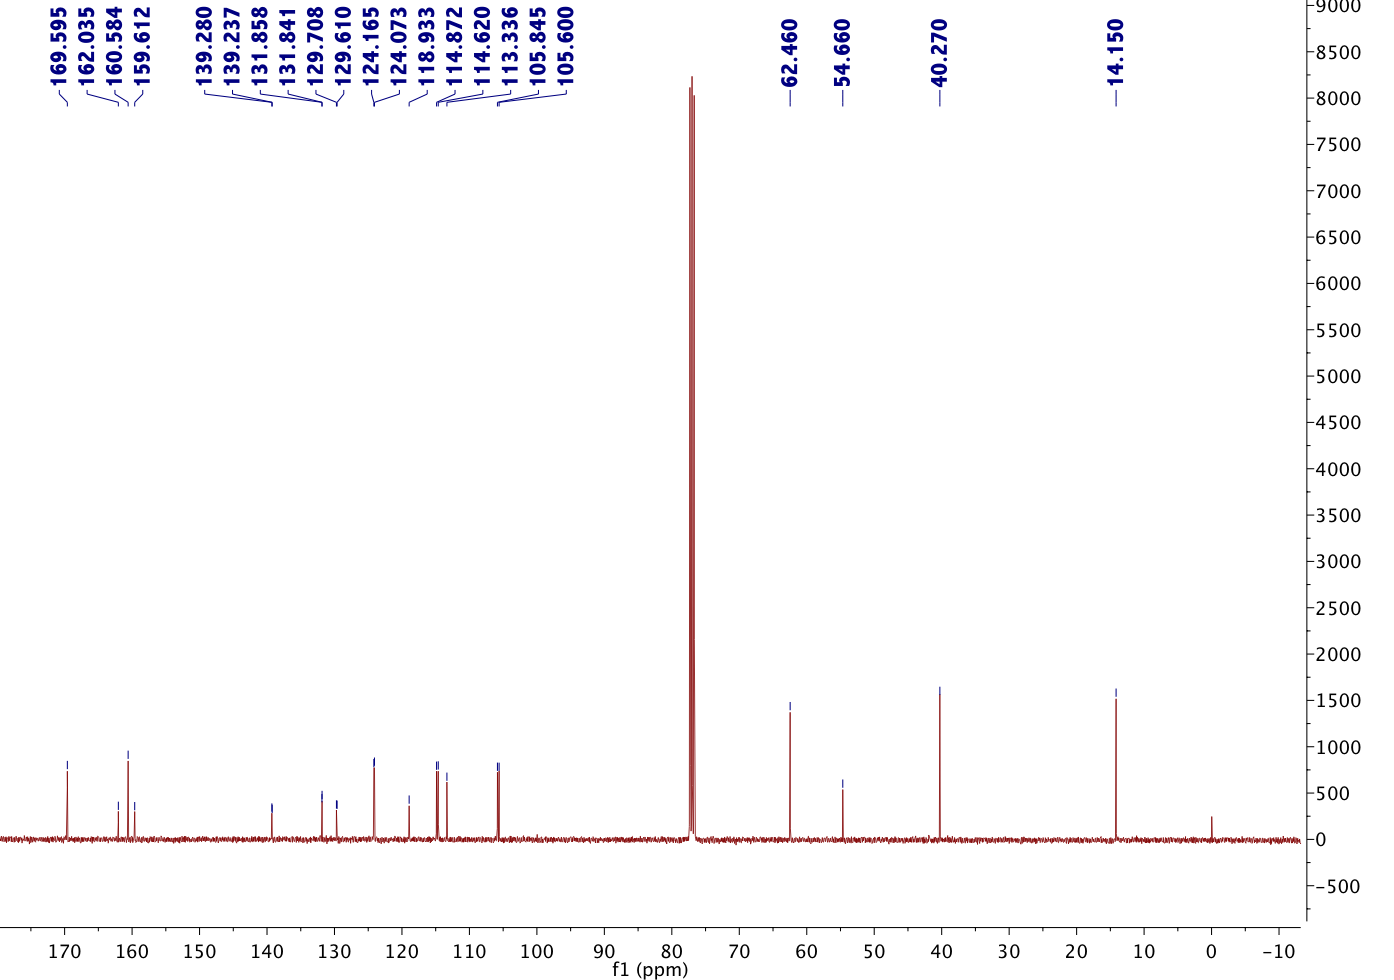


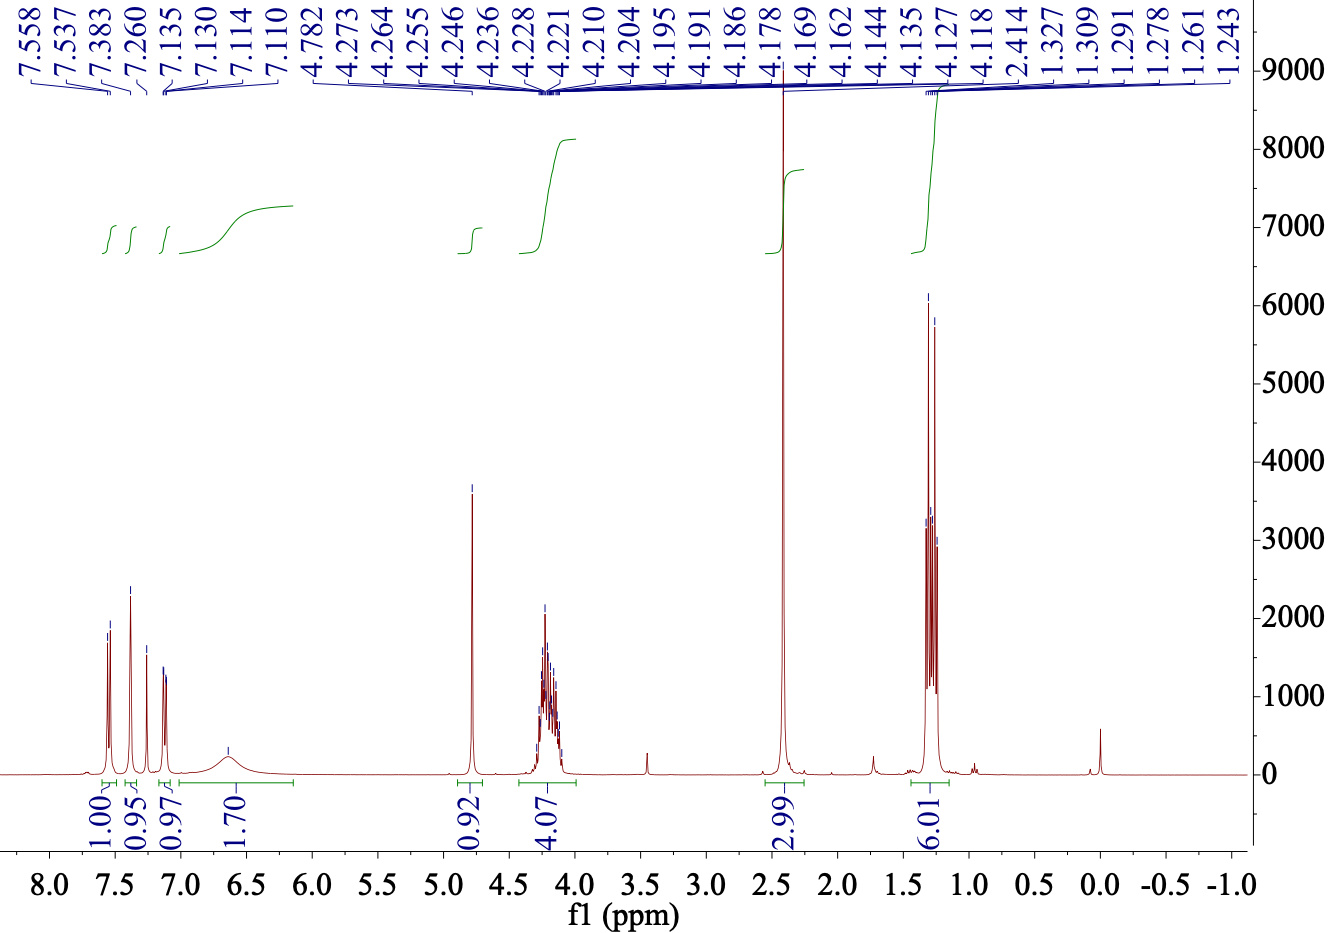


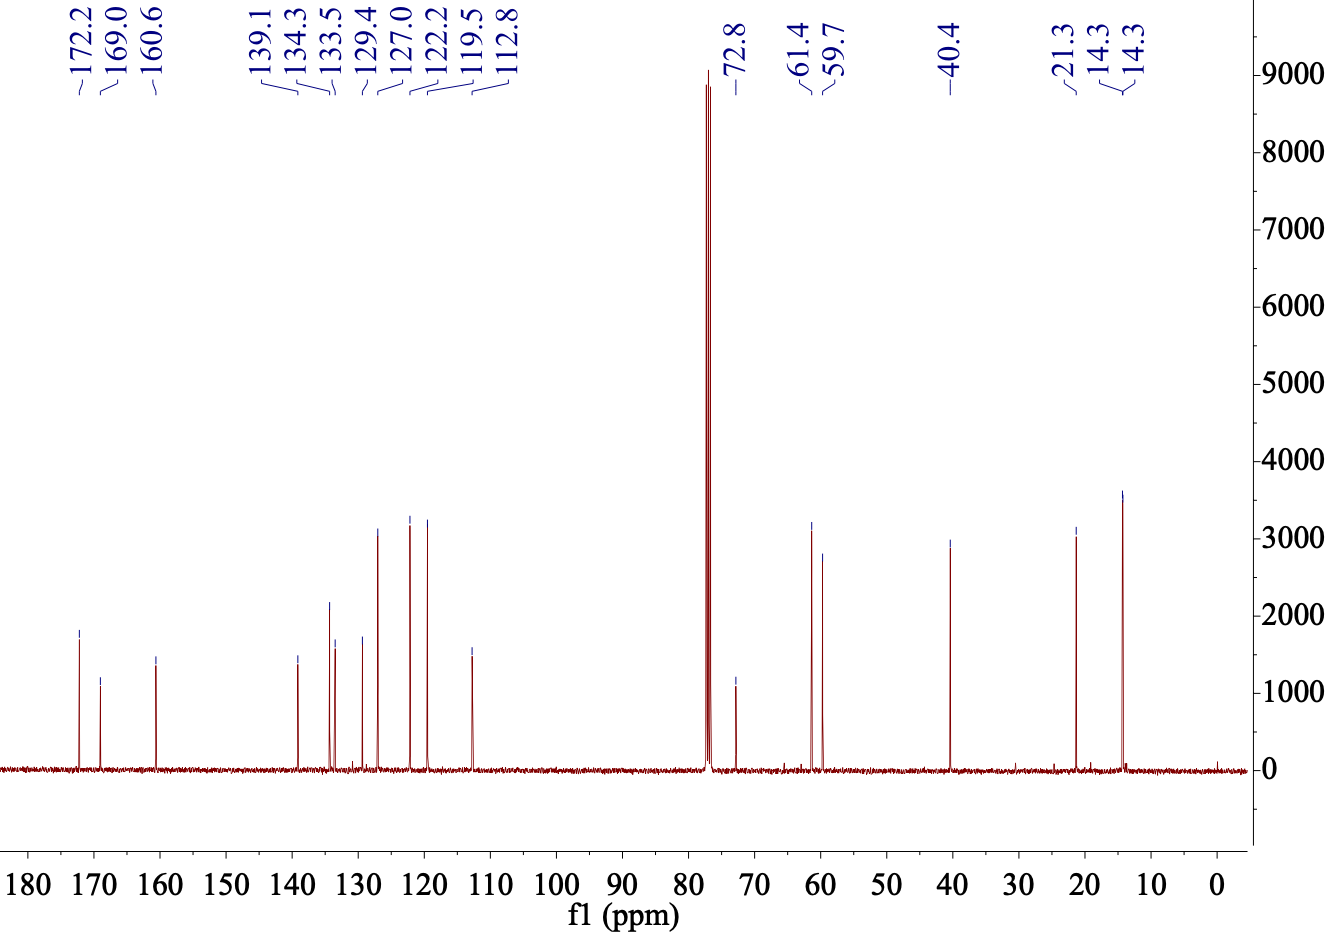

Supplement: f1 [file 4361410.f1.docx]
